# Supplementary material for: Targeted Expression to Liver of an antimiR-33 Sponge as a Gene Therapy Strategy against Hypercholesterolemia: In Vitro Study
Source: MDPI journal article supplement (doi:10.3390/cimb45090445), 2023-08-24
Supplement: s1 [file s1]

## SUPPLEMENTARY MATERIALS

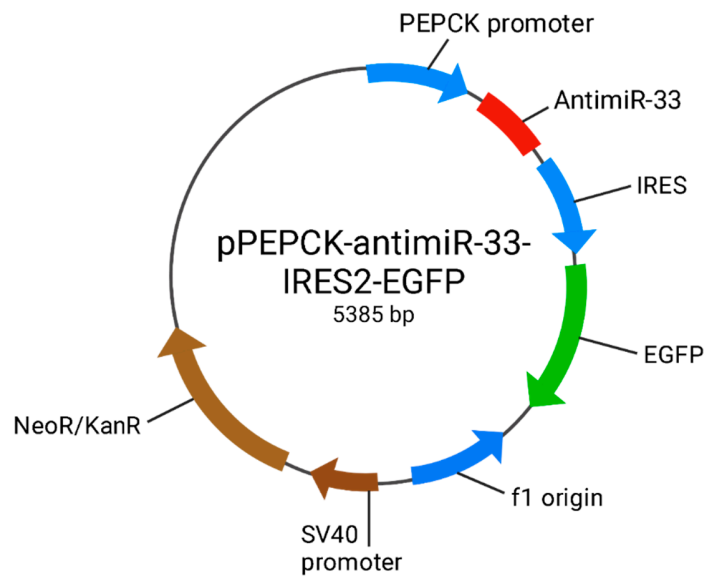

**Figure S1. Design and *in silico* construction of recombinant plasmid pPEPCK-antimiR-33-IRES2-EGFP.** The recombinant plasmid contains the antimiR-33 sponge and the EGFP reporter gene, under the transcriptional control of PEPCK promoter. Created with BioRender.com.

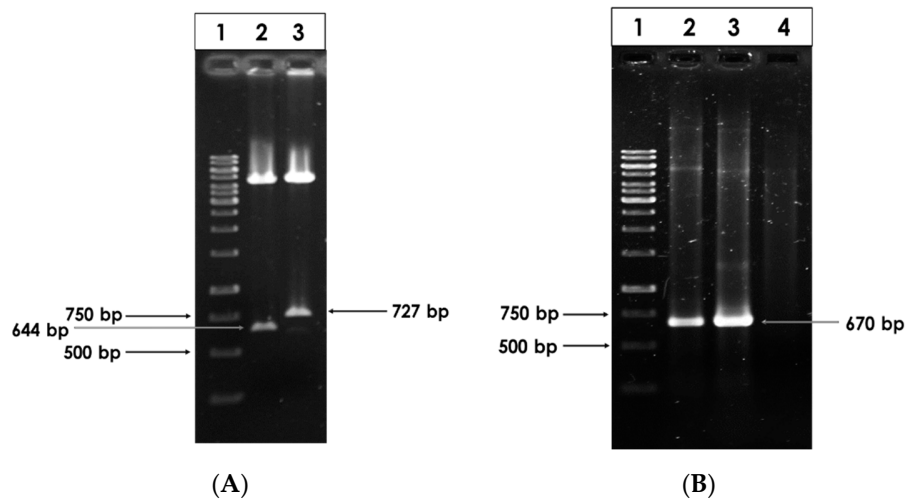

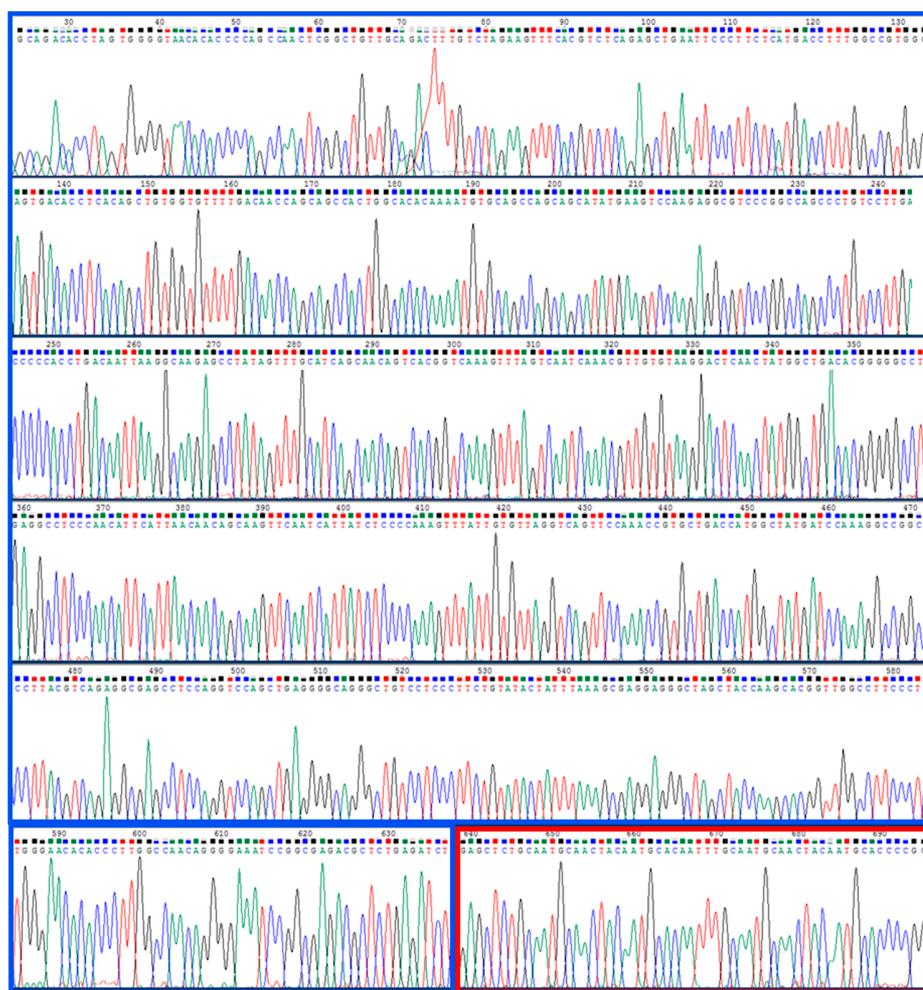

(C)

```

#=====
#
# Aligned_sequences: 2
# 1: secuenciación
# 2: pPEPCK-antimiR-33
# Matrix: EDNAFULL
# Gap_penalty: 10.0
# Extend_penalty: 0.5
#
# Length: 762
# Identity: 762/762 (100.0%)
# Similarity: 762/762 (100.0%)
# Gaps: 0/762 ( 0.0%)
# Score: 3810.0
#
#=====
Secuenciació 1 CCAGCAGACACCTAGTGGGGTAACACACCCAGCCAACTCGGCTGTTGCA 50
pPEPCK-antimi 64 CCAGCAGACACCTAGTGGGGTAACACACCCAGCCAACTCGGCTGTTGCA 113
Secuenciació 51 GACTTTGTCTAGAAGTTTCACGTCTCAGAGCTGAATTCCTTCTCATGAC 100
pPEPCK-antimi 114 GACTTTGTCTAGAAGTTTCACGTCTCAGAGCTGAATTCCTTCTCATGAC 163
Secuenciació 101 CTTTGGCCGTGGGAGTGACACCTCACAGCTGTGGTGTGTTGACAACCAAGC 150
pPEPCK-antimi 164 CTTTGGCCGTGGGAGTGACACCTCACAGCTGTGGTGTGTTGACAACCAAGC 213
Secuenciació 151 AGCCACTGGCACACAAAATGTGCAGCCAGCAGCATATGAAGTCCAAGAGG 200
pPEPCK-antimi 214 AGCCACTGGCACACAAAATGTGCAGCCAGCAGCATATGAAGTCCAAGAGG 263
Secuenciació 201 CGTCCCAGCCAGCCCTGTCTTGACCCCACTGACAATTAAGGCAAGAG 250
pPEPCK-antimi 264 CGTCCCAGCCAGCCCTGTCTTGACCCCACTGACAATTAAGGCAAGAG 313
Secuenciació 251 CCTATAGTTTGCATCAGCAACAGTCACGGTCAAAGTTTAGTCAATCAAAAC 300
pPEPCK-antimi 314 CCTATAGTTTGCATCAGCAACAGTCACGGTCAAAGTTTAGTCAATCAAAAC 363
Secuenciació 351 CATTCAATTAACAACAGCAAGTTCAATCATTATCTCCCAAGTTTATTGT 400
pPEPCK-antimi 414 CATTCAATTAACAACAGCAAGTTCAATCATTATCTCCCAAGTTTATTGT 463
Secuenciació 401 GTTAGGTCAGTTCCAAACCGTGCTGACCATGGCTATGATCCAAAGGCCGG 450
pPEPCK-antimi 464 GTTAGGTCAGTTCCAAACCGTGCTGACCATGGCTATGATCCAAAGGCCGG 513
Secuenciació 451 CCCCTTACGTGAGGCGAGCCTCCAGGTCCAGCTGAGGGGCAAGGCTGT 500
pPEPCK-antimi 514 CCCCTTACGTGAGGCGAGCCTCCAGGTCCAGCTGAGGGGCAAGGCTGT 563
Secuenciació 501 CCTCCCTTCTGTACTATTTAAAGCGAGGAGGGCTAGCTACCAAGCACG 550
pPEPCK-antimi 564 CCTCCCTTCTGTACTATTTAAAGCGAGGAGGGCTAGCTACCAAGCACG 613
Secuenciació 551 GTTGGCCTTCCCTCTGGGAACACACCTTGGCCAACAGGGGAAATCCGGC 600
pPEPCK-antimi 614 GTTGGCCTTCCCTCTGGGAACACACCTTGGCCAACAGGGGAAATCCGGC 663
Secuenciació 601 GAGACGCTCTGAGATCTGAGCTCTGCAATGCAACTACAATGCACAATTT 650
pPEPCK-antimi 664 GAGACGCTCTGAGATCTGAGCTCTGCAATGCAACTACAATGCACAATTT 713
Secuenciació 651 GCAATGCAACTACAATGCACCCCGGTTCCGCCCCCTCTCCCTCCCCCCCC 700
pPEPCK-antimi 714 GCAATGCAACTACAATGCACCCCGGTTCCGCCCCCTCTCCCTCCCCCCCC 763

```

(D)

**Figure S2. Characterization of recombinant plasmid pPEPCK-antimiR-33-IRES2-EGFP.** (A) Electropherogram showing enzyme restriction with AseI and XmaI of the recombinant and control plasmid, 1. 1 Kb molecular size marker, 2. Parent plasmid pIRES2-EGFP (644 bp = CMV promoter and part of the MCS), and 3. Recombinant plasmid pPEPCK-antimiR33-IRES2-EGFP (727 bp = PEPCK promoter and antimiR-33 sponge); (B) Electropherogram showing the PEPCK promoter obtained by PCR, 1. 1 Kb molecular size marker, 2. Positive control of the PEPCK promoter, 3. Amplification of the PEPCK promoter from the recombinant plasmid pPEPCK-antimiR-33-IRES2-EGFP, and 4. Negative control of PCR reaction; (C) PEPCK promoter sequence and antimiR-33 sponge in the recombinant plasmid pPEPCK-antimiR-33-IRES2-EGFP, PEPCK promoter in blue and antimiR-33 sponge in red; (D) comparison of the designed plasmid pPEPCK-antimiR-33-IRES2-EGFP to the nucleotide sequence obtained by sequencing, PEPCK promoter (Blue square) and antimiR-33 sponge (Red square).
